# Supplementary material
Source: ML conference proceedings conference paper supplement (https://openreview.net/forum?id=Gkogn48LeI)
Supplement: supplementary_material [file attachment]

## Sheet: Study 1 - Post1D2D 
Item		Rating
Layout	Question	Strongly Agree	Agree	Agree a little	Neutral	Disagree a little	Disagree	Strongly Disagree
1D	Easy to Navigate	4	8	6	1	7	3	1
	Quickly Find Info	4	5	7	6	5	2	1
	Easy to Compare Graphs	3	4	5	1	5	10	2
	Easy to Compare Numbers	1	7	3	0	8	7	4
	Easy to Compare Code	0	4	5	1	5	8	7
2D	Easy to Navigate	18	8	4	0	0	0	0
	Quickly Find Info	16	13	0	0	0	0	1
	Easy to Compare Graphs	19	9	2	0	0	0	0
	Easy to Compare Numbers	19	6	4	0	0	1	0
	Easy to Compare Code	24	4	0	1	0	1	0

## Sheet: Sheet3
Item		Rating
Category	Question	Strongly Agree	Agree	Agree a little	Neutral	Disagree a little	Disagree	Strongly Disagree
2D Better than 1D at <task>	Navigate	15	7	2	4	2	0	0
	Locate Items	17	8	4	1	0	0	0
	Organize & Clean	10	10	5	3	2	0	0
	Present	9	7	3	7	3	1	0
	Explore & Prep Data	12	12	5	0	1	0	0
	Analyze & Develop	14	9	1	5	1	0	0
	Debug code	12	11	4	1	2	0	0
	Compare results	27	3	0	0	0	0	0
	Collaborate	8	8	3	9	2	0	0
Statements about 2D Layout	2D Spatial Layout Improved Performance	19	7	4	0	0	0	0
	More Cells on Screen in 2D Improved Performance	18	8	3	0	1	0	0
	2D Layouts Better Used Screen Space	21	6	3	0	0	0	0
	Would Use 2D instead of 1D	17	10	2	1	0	0	0

## Sheet: Study 2 - Survey
Statement	Strongly Agree (2)	Agree (1)	Neither agree nor disagree (0)	Disagree (-1)	Strongly disagree (-2)
I found the use of the 2D extension to be beneficial in organizing my notebook.	2	3	1	0	1
I found the use of the 2D extension to be beneficial in data processing.	1	2	3	0	1
I found the use of the 2D extension to be beneficial in creating visualizations.	3	2	1	0	1
I found the use of the 2D extension to be beneficial in debugging my code.	0	4	2	0	1
It was easy to understand how to use the 2D extension.	2	5	0	0	0
It was easy to navigate in the 2D notebook.	0	5	1	1	0
I prefer using the 2D notebook environment over the traditional notebook environment.	0	3	4	0	0
