# Supplementary material
Source: ML conference proceedings conference paper supplement (https://openreview.net/forum?id=Gkogn48LeI)
Supplement: supplementary_material [file attachment]

| Task Name         | Correct Answer               |
|-------------------|------------------------------|
| 1D Find           | Ohio                         |
| 1D Graph Compare  | NYC, NY                      |
| 1D Number Compare | Ohio                         |
| 1D PT Euclidean   | 43                           |
| 1D PT Manhattan   | 51                           |
| 1D PT Best        | Manhattan                    |
| 1D Code Compare   | Conversion Vals              |
| 1D Code Compare   | Different Distance Metrics   |
| 1D Code Compare   | Var Name for Distance Matrix |
| 1D Code Compare   | K-Value                      |
| 1D Code Compare   | Print Message                |
| 2D Find           | Illinois                     |
| 2D Graph Compare  | Sabine, Texas                |
| 2D Number Compare | Pennsylvania                 |
| 2D PT Euclidean   | 53                           |
| 2D PT Manhattan   | 45                           |
| 2D PT Best        | Manhattan                    |
| 2D Code Compare   | Head or Tail                 |
| 2D Code Compare   | Train-Test Split             |
| 2D Code Compare   | Normalized?                  |
| 2D Code Compare   | Same Dist Metric, Diff Code  |
| 2D Code Compare   | K-Value                      |
