# Supplementary material
Source: ML conference proceedings conference paper supplement (https://openreview.net/forum?id=Gkogn48LeI)
Supplement: supplementary_material [file attachment]

# Imports and Functions

```
In [1]: # Import Statements

import pandas as pd
import numpy as np
import matplotlib as mpl
import matplotlib.pyplot as plt
from matplotlib.dates import *
from sklearn.linear_model import LinearRegression
import statsmodels.api as sm
from statsmodels.formula.api import ols
from statsmodels.stats.multicomp import pairwise_tukeyhsd
import scipy.stats as stats
import statsmodels.graphics.gofplots as smg
```

## Efficiency (Time) Data Analysis

```
In [2]: time_data = pd.read_csv("2Dv1D CNB Efficiency Times.csv")
time_data
```

```
Out[2]:
```

|     | SID       | Task             | Condition | Layout | Time |
|-----|-----------|------------------|-----------|--------|------|
| 0   | 1D_1128_1 | Find             | 1Dv2D     | 1D     | 72   |
| 1   | 1D_1128_1 | Graph Compare    | 1Dv2D     | 1D     | 171  |
| 2   | 1D_1128_1 | Number Compare   | 1Dv2D     | 1D     | 195  |
| 3   | 1D_1128_1 | Parameter Tuning | 1Dv2D     | 1D     | 491  |
| 4   | 1D_1128_1 | Code Comparison  | 1Dv2D     | 1D     | 333  |
| ... | ...       | ...              | ...       | ...    | ...  |
| 295 | 2D_1210_1 | Find             | 2Dv1D     | 2D     | 12   |
| 296 | 2D_1210_1 | Graph Compare    | 2Dv1D     | 2D     | 42   |
| 297 | 2D_1210_1 | Number Compare   | 2Dv1D     | 2D     | 24   |
| 298 | 2D_1210_1 | Parameter Tuning | 2Dv1D     | 2D     | 174  |
| 299 | 2D_1210_1 | Code Comparison  | 2Dv1D     | 2D     | 69   |

300 rows × 5 columns

## Find Task

```
In [3]: find_task = time_data[time_data["Task"] == "Find"]
```

```
In [4]: model = ols('Time ~ C(Condition) + C(Layout) + C(Condition):C(Layout)', data=find_task)
```

```
sm.stats.anova_lm(model, typ=2)
```

Out[4]:

|                               | sum_sq       | df   | F        | PR(>F)   |
|-------------------------------|--------------|------|----------|----------|
| <b>C(Condition)</b>           | 2870.416667  | 1.0  | 5.379366 | 0.024049 |
| <b>C(Layout)</b>              | 660.016667   | 1.0  | 1.236918 | 0.270818 |
| <b>C(Condition):C(Layout)</b> | 421.350000   | 1.0  | 0.789640 | 0.378010 |
| <b>Residual</b>               | 29881.466667 | 56.0 | NaN      | NaN      |

In [5]:

```
stats.chisquare(find_task["Time"])  
smg.ProbPlot(find_task["Time"]).qqplot(line='s')
```

Out[5]:

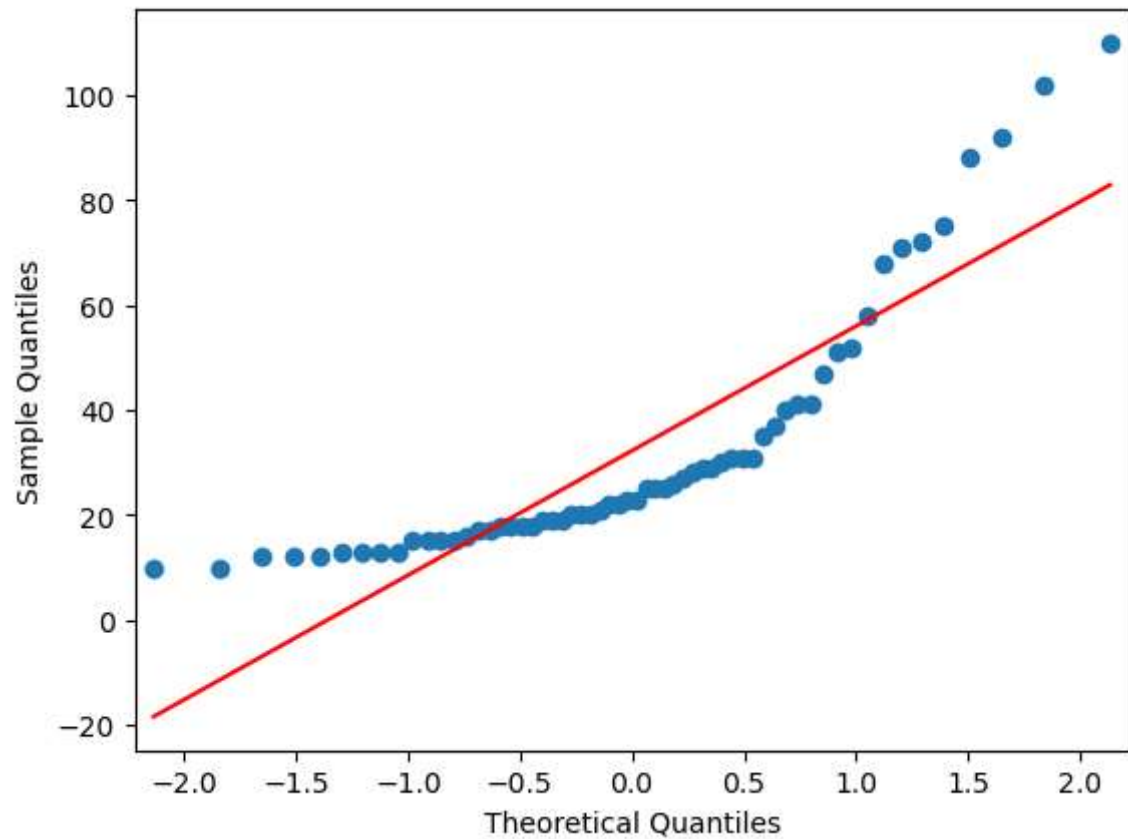

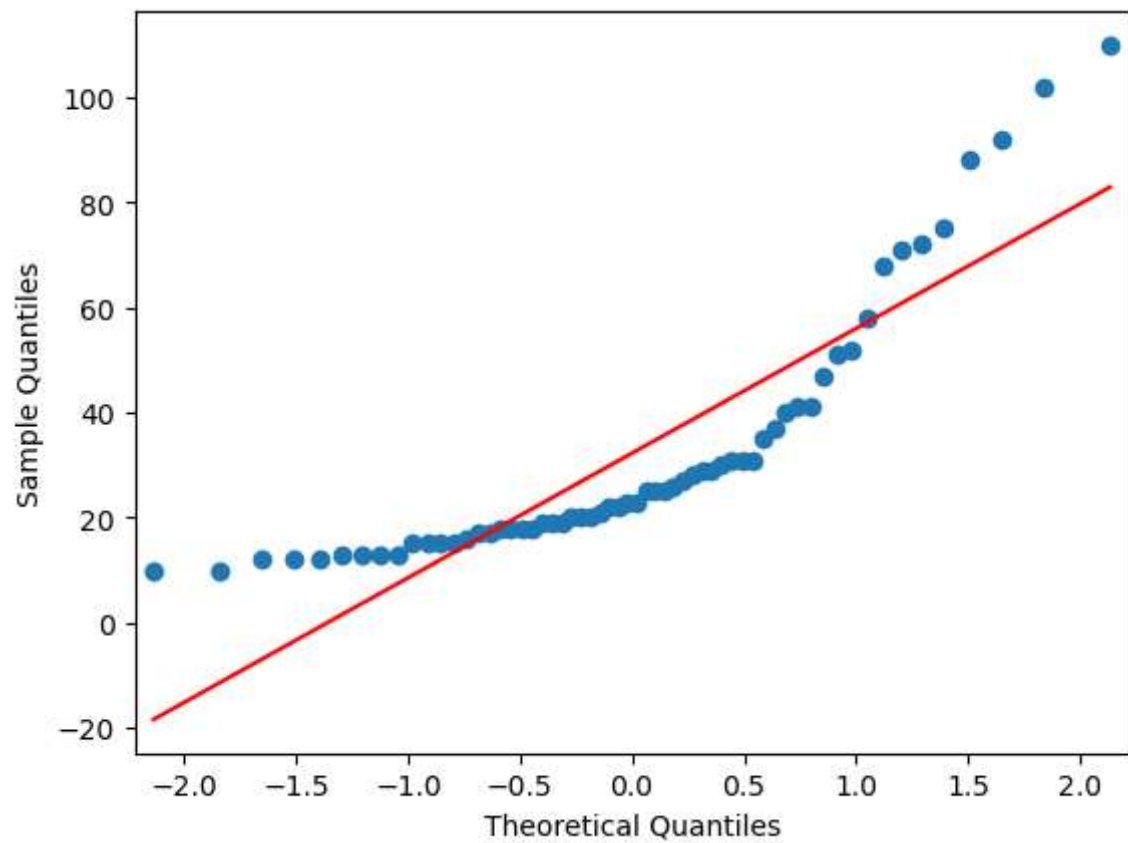

```
In [6]: find_task_1D = find_task[find_task["Layout"]=="1D"]  
find_task_2D = find_task[find_task["Layout"] == "2D"]  
find_task_2D
```

Out[6]:

|     | SID       | Task | Condition | Layout | Time |
|-----|-----------|------|-----------|--------|------|
| 5   | 1D_1128_1 | Find | 1Dv2D     | 2D     | 88   |
| 15  | 1D_1129_2 | Find | 1Dv2D     | 2D     | 102  |
| 25  | 1D_1129_4 | Find | 1Dv2D     | 2D     | 52   |
| 35  | 1D_1130_2 | Find | 1Dv2D     | 2D     | 51   |
| 45  | 1D_1130_6 | Find | 1Dv2D     | 2D     | 30   |
| 55  | 1D_1201_1 | Find | 1Dv2D     | 2D     | 10   |
| 65  | 1D_1202_1 | Find | 1Dv2D     | 2D     | 19   |
| 75  | 1D_1202_3 | Find | 1Dv2D     | 2D     | 12   |
| 85  | 1D_1203_1 | Find | 1Dv2D     | 2D     | 13   |
| 95  | 1D_1203_3 | Find | 1Dv2D     | 2D     | 25   |
| 105 | 1D_1205_1 | Find | 1Dv2D     | 2D     | 31   |
| 115 | 1D_1206_2 | Find | 1Dv2D     | 2D     | 15   |
| 125 | 1D_1207_2 | Find | 1Dv2D     | 2D     | 23   |
| 135 | 1D_1208_2 | Find | 1Dv2D     | 2D     | 12   |
| 145 | 1D_1212_1 | Find | 1Dv2D     | 2D     | 15   |
| 155 | 2D_1129_1 | Find | 2Dv1D     | 2D     | 68   |
| 165 | 2D_1129_3 | Find | 2Dv1D     | 2D     | 18   |
| 175 | 2D_1130_1 | Find | 2Dv1D     | 2D     | 31   |
| 185 | 2D_1130_3 | Find | 2Dv1D     | 2D     | 13   |
| 195 | 2D_1130_5 | Find | 2Dv1D     | 2D     | 13   |
| 205 | 2D_1130_7 | Find | 2Dv1D     | 2D     | 13   |
| 215 | 2D_1201_2 | Find | 2Dv1D     | 2D     | 58   |
| 225 | 2D_1202_2 | Find | 2Dv1D     | 2D     | 22   |
| 235 | 2D_1202_4 | Find | 2Dv1D     | 2D     | 29   |
| 245 | 2D_1203_2 | Find | 2Dv1D     | 2D     | 15   |
| 255 | 2D_1203_4 | Find | 2Dv1D     | 2D     | 18   |
| 265 | 2D_1206_1 | Find | 2Dv1D     | 2D     | 17   |
| 275 | 2D_1207_1 | Find | 2Dv1D     | 2D     | 22   |
| 285 | 2D_1208_1 | Find | 2Dv1D     | 2D     | 21   |
| 295 | 2D_1210_1 | Find | 2Dv1D     | 2D     | 12   |

```
In [7]: stats.kruskal(find_task_1D['Time'], find_task_2D["Time"])
```

Out[7]: KruskalResult(statistic=3.7282601435966094, pvalue=0.0534990929878251)

# Graph Compare Task

```
In [8]: graphCom_task = time_data[time_data["Task"] == "Graph Compare"]
```

```
In [9]: model = ols('Time ~ C(Condition) + C(Layout) + C(Condition):C(Layout)', data=graphCom_task,
sm.stats.anova_lm(model, typ=2)
```

```
Out[9]:
```

|                               | sum_sq       | df   | F         | PR(>F)   |
|-------------------------------|--------------|------|-----------|----------|
| <b>C(Condition)</b>           | 2160.000000  | 1.0  | 2.695556  | 0.106233 |
| <b>C(Layout)</b>              | 14415.000000 | 1.0  | 17.989089 | 0.000084 |
| <b>C(Condition):C(Layout)</b> | 3872.066667  | 1.0  | 4.832116  | 0.032084 |
| <b>Residual</b>               | 44873.866667 | 56.0 | NaN       | NaN      |

```
In [10]: tukey_layout = pairwise_tukeyhsd(graphCom_task['Time'], graphCom_task['Layout'], 0.05)
print(tukey_layout)
```

```
Multiple Comparison of Means - Tukey HSD, FWER=0.05
=====
group1 group2 meandiff p-adj lower upper reject
-----
1D      2D      -31.0 0.0002 -46.3118 -15.6882 True
-----
```

```
In [11]: graphCom_task['Combos'] = graphCom_task['Condition'] + "-" + graphCom_task['Layout']
```

```
C:\Users\harde\AppData\Local\Temp\ipykernel_18196\3858717447.py:1: SettingWithCopyWarning:
A value is trying to be set on a copy of a slice from a DataFrame.
Try using .loc[row_indexer,col_indexer] = value instead

See the caveats in the documentation: https://pandas.pydata.org/pandas-docs/stable/user_guide/indexing.html#returning-a-view-versus-a-copy
graphCom_task['Combos'] = graphCom_task['Condition'] + "-" + graphCom_task['Layout']
```

```
In [12]: tukey_combos = pairwise_tukeyhsd(graphCom_task['Time'], graphCom_task['Combos'], 0.05)
print(tukey_combos)
```

```
Multiple Comparison of Means - Tukey HSD, FWER=0.05
=====
group1 group2 meandiff p-adj lower upper reject
-----
1Dv2D-1D 1Dv2D-2D -47.0667 0.0002 -74.4365 -19.6969 True
1Dv2D-1D 2Dv1D-1D -28.0667 0.0424 -55.4365 -0.6969 True
1Dv2D-1D 2Dv1D-2D -43.0 0.0006 -70.3698 -15.6302 True
1Dv2D-2D 2Dv1D-1D 19.0 0.2666 -8.3698 46.3698 False
1Dv2D-2D 2Dv1D-2D 4.0667 0.9791 -23.3031 31.4365 False
2Dv1D-1D 2Dv1D-2D -14.9333 0.4774 -42.3031 12.4365 False
-----
```

NOTE: meandiff = group2 - group1, as seen here:

<https://github.com/statsmodels/statsmodels/issues/8458>

The practice effect seems to have overwhelmed the effect of the layout in the 2Dv1D condition, and when comparing the second item in each order (e.g. 2D for 1Dv2D and 1D for 2Dv1D), the results weren't significant. Also, for the second layout in each order, the results were not significant. Otherwise, 2D came out on top.

```
In [13]: print("Overall Mean Time to Completion")
graphCom_task['Time'].mean()
```

```
Overall Mean Time to Completion
80.46666666666667
```

```
In [14]: print("Mean Time to Completion by Layout")
graphCom_task.groupby('Layout').mean()
```

```
Mean Time to Completion by Layout
```

```
Out[14]:
```

|  | Time |
|--|------|
|--|------|

| Layout |  |
|--------|--|
|--------|--|

|    |           |
|----|-----------|
| 1D | 95.966667 |
|----|-----------|

|    |           |
|----|-----------|
| 2D | 64.966667 |
|----|-----------|

```
In [15]: print("Mean Time to Completion by Condition and Layout")
graphCom_task.groupby(['Condition', 'Layout']).mean()
```

```
Mean Time to Completion by Condition and Layout
```

```
Out[15]:
```

|  |  | Time |
|--|--|------|
|--|--|------|

| Condition | Layout |  |
|-----------|--------|--|
|-----------|--------|--|

|       |    |            |
|-------|----|------------|
| 1Dv2D | 1D | 110.000000 |
|-------|----|------------|

|    |           |
|----|-----------|
| 2D | 62.933333 |
|----|-----------|

|       |    |           |
|-------|----|-----------|
| 2Dv1D | 1D | 81.933333 |
|-------|----|-----------|

|    |           |
|----|-----------|
| 2D | 67.000000 |
|----|-----------|

```
In [16]: smg.ProbPlot(graphCom_task["Time"]).qqplot(line='s')
```

Out[16]:

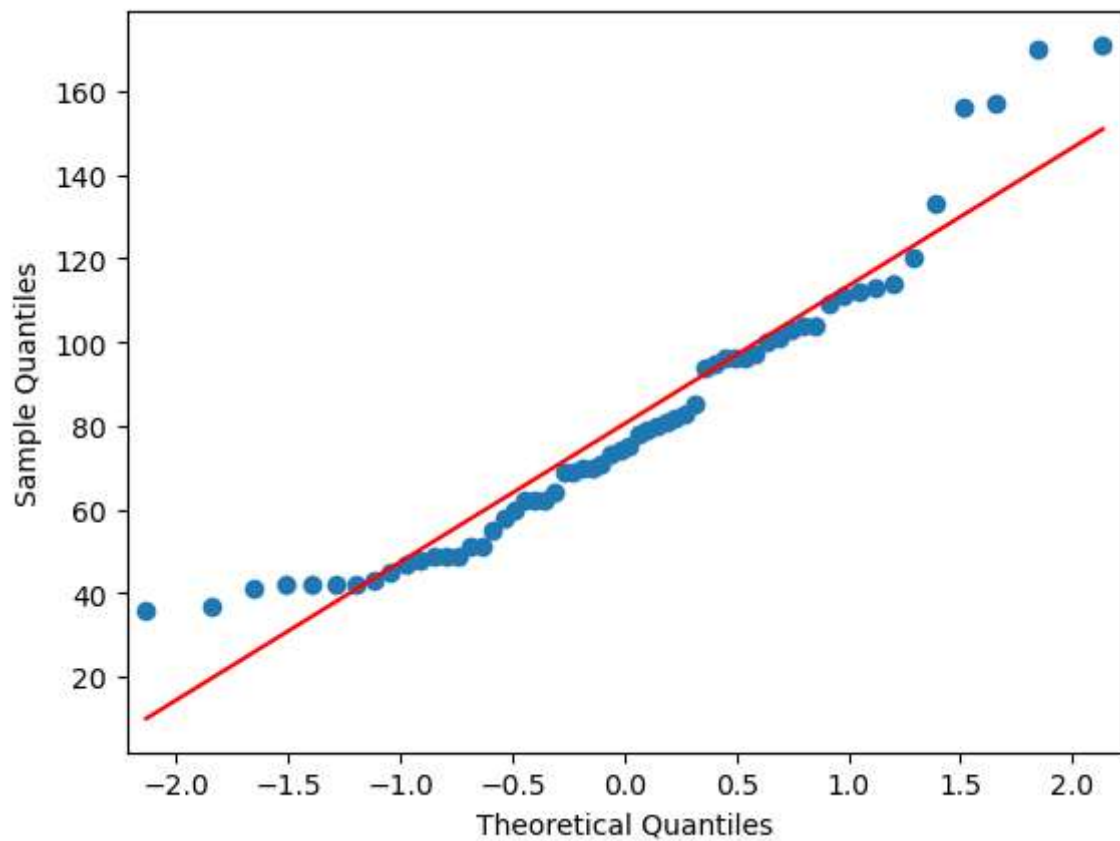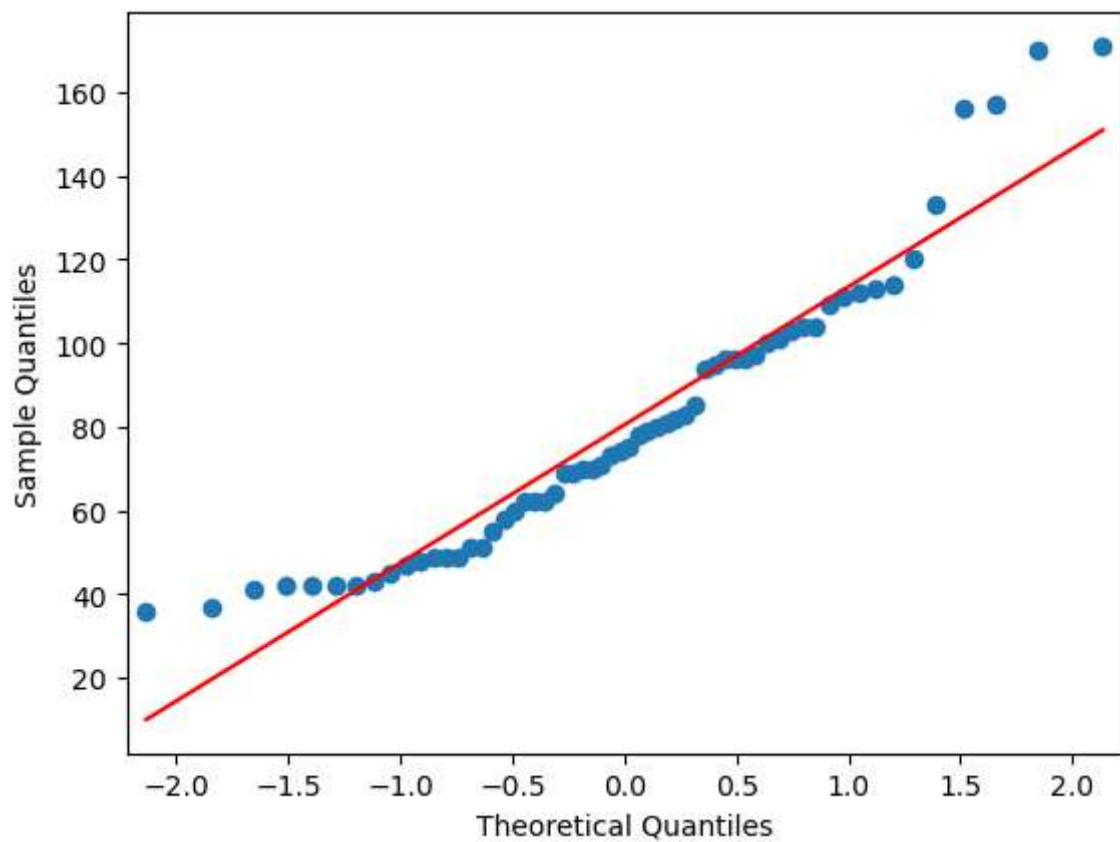

```
In [17]: stats.chisquare(graphCom_task["Time"])
```

```
Out[17]: Power_divergenceResult(statistic=811.7763048881525, pvalue=7.63239003560691e-133)
```

```
In [18]: graphCom_task_1D = graphCom_task[graphCom_task["Layout"]=="1D"]
graphCom_task_2D = graphCom_task[graphCom_task["Layout"] == "2D"]
```

```
In [19]: stats.kruskal(graphCom_task_1D['Time'], graphCom_task_2D['Time'])
```

```
Out[19]: KruskalResult(statistic=16.783490898305708, pvalue=4.189621859098256e-05)
```

## Number Compare Task

```
In [20]: numCom_task = time_data[time_data["Task"] == "Number Compare"]
model = ols('Time ~ C(Condition) + C(Layout) + C(Condition):C(Layout)', data=numCom_task)
sm.stats.anova_lm(model, typ=2)
```

```
Out[20]:
```

|                               | sum_sq       | df   | F         | PR(>F)   |
|-------------------------------|--------------|------|-----------|----------|
| <b>C(Condition)</b>           | 3480.816667  | 1.0  | 5.435925  | 0.023350 |
| <b>C(Layout)</b>              | 11234.016667 | 1.0  | 17.543948 | 0.000100 |
| <b>C(Condition):C(Layout)</b> | 5023.350000  | 1.0  | 7.844869  | 0.006983 |
| <b>Residual</b>               | 35858.800000 | 56.0 | NaN       | NaN      |

```
In [21]: numCom_task['Combos'] = numCom_task['Condition'] + "-" + numCom_task['Layout']
```

C:\Users\harde\AppData\Local\Temp\ipykernel\_18196\2701913620.py:1: SettingWithCopyWarning:  
A value is trying to be set on a copy of a slice from a DataFrame.  
Try using .loc[row\_indexer,col\_indexer] = value instead

See the caveats in the documentation: [https://pandas.pydata.org/pandas-docs/stable/user\\_guide/indexing.html#returning-a-view-versus-a-copy](https://pandas.pydata.org/pandas-docs/stable/user_guide/indexing.html#returning-a-view-versus-a-copy)

```
numCom_task['Combos'] = numCom_task['Condition'] + "-" + numCom_task['Layout']
```

```
In [22]: tukey_layout = pairwise_tukeyhsd(numCom_task['Time'], numCom_task['Layout'], 0.05)
print(tukey_layout)
```

```
Multiple Comparison of Means - Tukey HSD, FWER=0.05
=====
group1 group2 meandiff p-adj  lower  upper  reject
-----
1D      2D -27.3667 0.0003 -41.6607 -13.0727  True
-----
```

```
In [23]: tukey_combos = pairwise_tukeyhsd(numCom_task['Time'], numCom_task['Combos'], 0.05)
print(tukey_combos)
```



# Multiple Comparison of Means - Tukey HSD, FWER=0.05

| group1   | group2   | meandiff | p-adj  | lower    | upper    | reject |
|----------|----------|----------|--------|----------|----------|--------|
| 1Dv2D-1D | 1Dv2D-2D | -45.6667 | 0.0    | -70.1332 | -21.2001 | True   |
| 1Dv2D-1D | 2Dv1D-1D | -33.5333 | 0.0034 | -57.9999 | -9.0668  | True   |
| 1Dv2D-1D | 2Dv1D-2D | -42.6    | 0.0001 | -67.0665 | -18.1335 | True   |
| 1Dv2D-2D | 2Dv1D-1D | 12.1333  | 0.5586 | -12.3332 | 36.5999  | False  |
| 1Dv2D-2D | 2Dv1D-2D | 3.0667   | 0.9873 | -21.3999 | 27.5332  | False  |
| 2Dv1D-1D | 2Dv1D-2D | -9.0667  | 0.7607 | -33.5332 | 15.3999  | False  |

The practice effect (repeated measures issue) seems to have overwhelmed the 2D layout effect when comparing 2Dv1D condition 1D v 2D; this may explain the results not being significant for that pair. Otherwise, 2D came out on top!

```
In [24]: print("Overall Mean Time to Completion")
numCom_task['Time'].mean()
```

Overall Mean Time to Completion

```
Out[24]: 45.483333333333334
```

```
In [25]: print("Mean Time to Completion by Layout")
numCom_task.groupby('Layout').mean()
```

Mean Time to Completion by Layout

```
Out[25]:
```

| Time   |           |
|--------|-----------|
| Layout |           |
| 1D     | 59.166667 |
| 2D     | 31.800000 |

```
In [26]: print("Mean Time to Completion by Condition and Layout")
numCom_task.groupby(['Condition', 'Layout']).mean()
```

Mean Time to Completion by Condition and Layout

```
Out[26]:
```

| Time             |    |           |
|------------------|----|-----------|
| Condition Layout |    |           |
| 1Dv2D            | 1D | 75.933333 |
|                  | 2D | 30.266667 |
| 2Dv1D            | 1D | 42.400000 |
|                  | 2D | 33.333333 |

```
In [27]: smg.ProbPlot(numCom_task["Time"]).qqplot(line='s')
```

Out[27]:

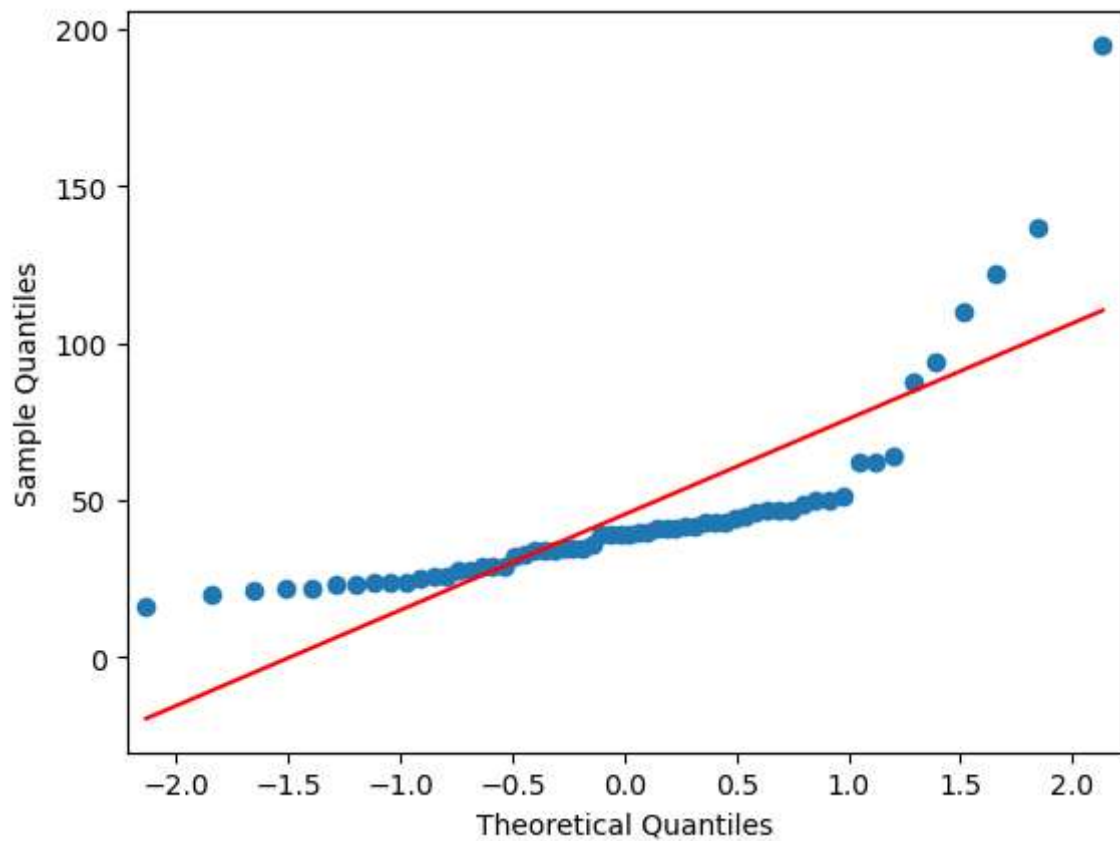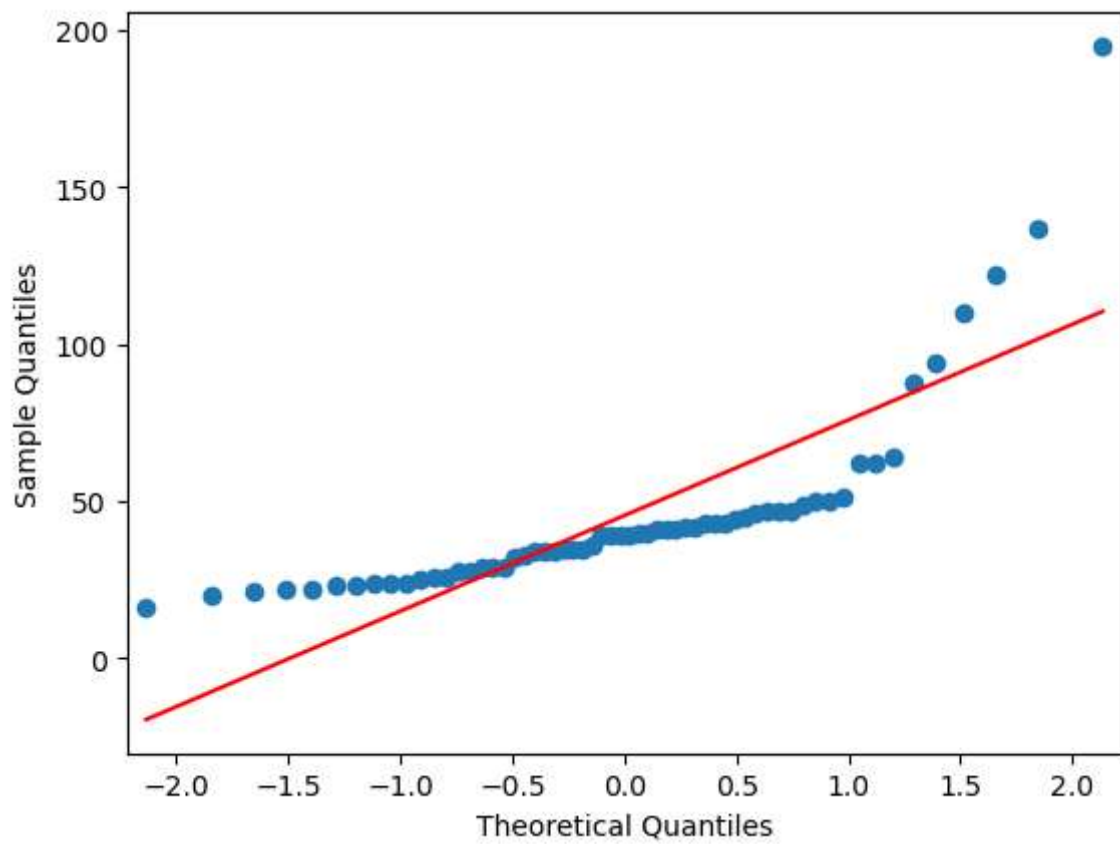

```
In [28]: stats.chisquare(numCom_task["Time"])
```

```
Out[28]: Power_divergenceResult(statistic=1222.3594723341885, pvalue=6.040360569828294e-217)
```

```
In [29]: numCom_task_1D = numCom_task[numCom_task["Layout"]=="1D"]
numCom_task_2D = numCom_task[numCom_task["Layout"] == "2D"]
```

```
In [30]: stats.kruskal(numCom_task_1D['Time'], numCom_task_2D['Time'])
```

```
Out[30]: KruskalResult(statistic=20.560103679798207, pvalue=5.77879767610255e-06)
```

## Parameter Tuning Task

```
In [31]: pt_task = time_data[time_data["Task"] == "Parameter Tuning"]
model = ols('Time ~ C(Condition) + C(Layout) + C(Condition):C(Layout)', data=pt_task).
sm.stats.anova_lm(model, typ=2)
```

```
Out[31]:
```

|                               | sum_sq        | df   | F        | PR(>F)   |
|-------------------------------|---------------|------|----------|----------|
| <b>C(Condition)</b>           | 36.816667     | 1.0  | 0.006740 | 0.934860 |
| <b>C(Layout)</b>              | 42933.750000  | 1.0  | 7.860318 | 0.006931 |
| <b>C(Condition):C(Layout)</b> | 8425.350000   | 1.0  | 1.542514 | 0.219420 |
| <b>Residual</b>               | 305876.933333 | 56.0 | NaN      | NaN      |

```
In [32]: tukey_layout = pairwise_tukeyhsd(pt_task['Time'], pt_task['Layout'], 0.05)
print(tukey_layout)
```

```
Multiple Comparison of Means - Tukey HSD, FWER=0.05
=====
group1 group2 meandiff p-adj  lower  upper  reject
-----
1D      2D      -53.5 0.0067 -91.5489 -15.4511  True
-----
```

2D came out on top in terms of efficiency for this task!

```
In [33]: print("Overall Mean Time to Completion")
pt_task['Time'].mean()
```

```
Overall Mean Time to Completion
250.95
```

```
In [34]: print("Mean Time to Completion by Layout")
pt_task.groupby('Layout').mean()
```

```
Mean Time to Completion by Layout
```

```
Out[34]:
```

|               | Time  |
|---------------|-------|
| <b>Layout</b> |       |
| <b>1D</b>     | 277.7 |
| <b>2D</b>     | 224.2 |

```
In [35]: smg.ProbPlot(pt_task["Time"]).qqplot(line='s')
```

Out[35]:

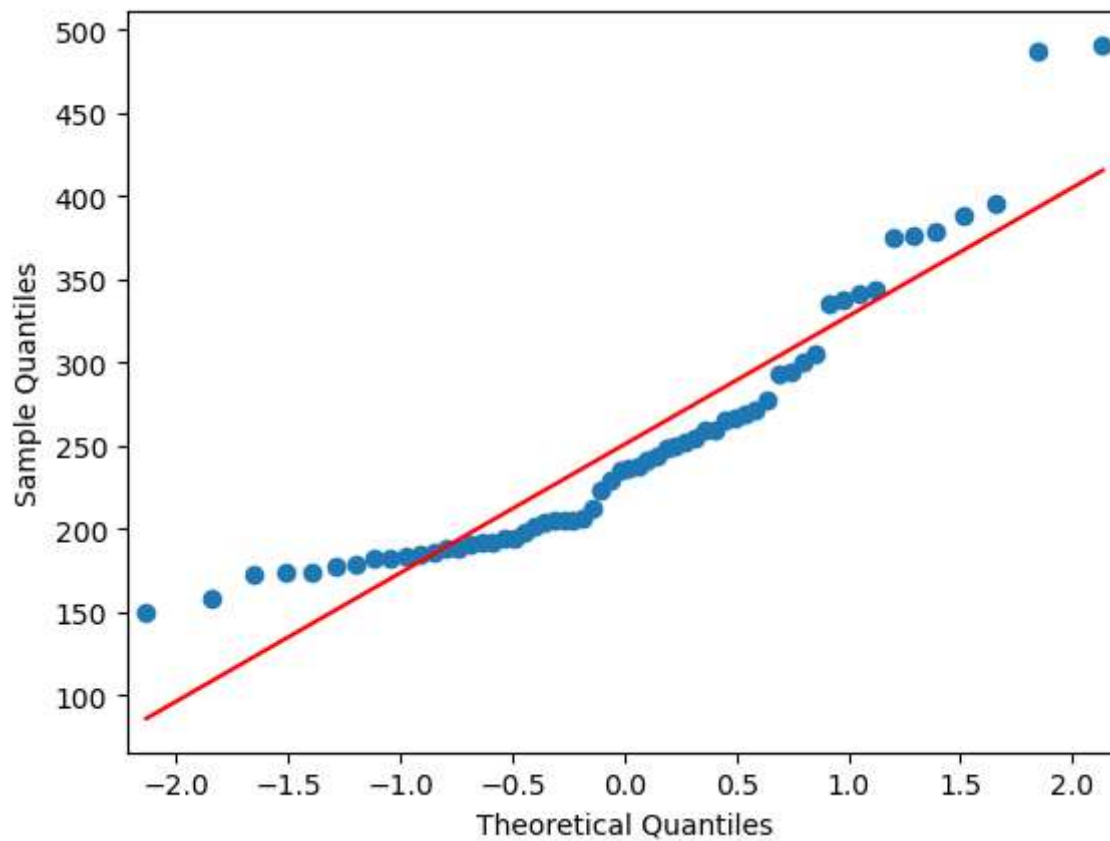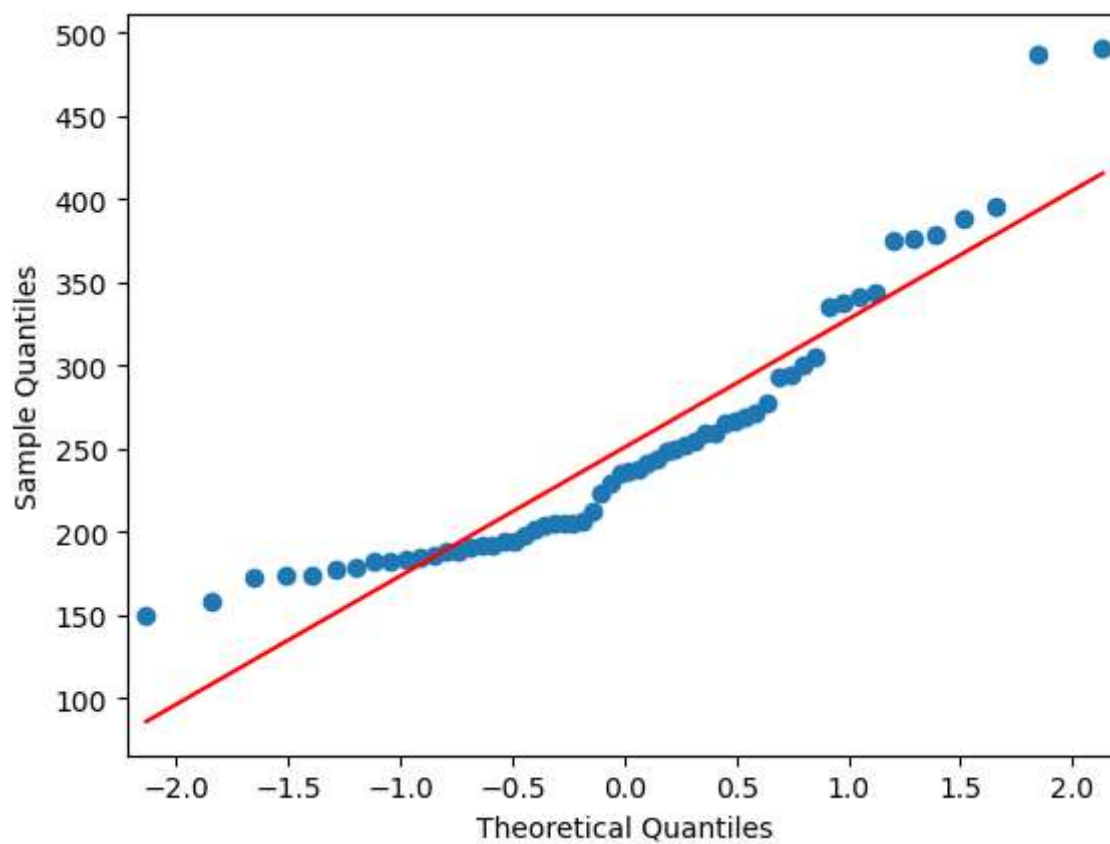

```
In [36]: stats.chisquare(pt_task["Time"])
```

```
Out[36]: Power_divergenceResult(statistic=1423.6814106395695, pvalue=8.885280973267302e-259)
```

```
In [37]: pt_task_1D = pt_task[pt_task["Layout"]=="1D"]
pt_task_2D = pt_task[pt_task["Layout"] == "2D"]
stats.kruskal(pt_task_1D['Time'], pt_task_2D['Time'])
```

```
Out[37]: KruskalResult(statistic=8.57156197887718, pvalue=0.0034145409792734004)
```

## Code Comparison Task

```
In [38]: cc_task = time_data[time_data["Task"] == "Code Comparison"]
model = ols('Time ~ C(Condition) + C(Layout) + C(Condition):C(Layout)', data=cc_task).
sm.stats.anova_lm(model, typ=2)
```

```
Out[38]:
```

|                               | sum_sq        | df   | F         | PR(>F)   |
|-------------------------------|---------------|------|-----------|----------|
| <b>C(Condition)</b>           | 183.750000    | 1.0  | 0.041191  | 0.839904 |
| <b>C(Layout)</b>              | 58844.016667  | 1.0  | 13.191141 | 0.000611 |
| <b>C(Condition):C(Layout)</b> | 65538.150000  | 1.0  | 14.691774 | 0.000323 |
| <b>Residual</b>               | 249808.933333 | 56.0 | NaN       | NaN      |

```
In [39]: tukey_layout = pairwise_tukeyhsd(cc_task['Time'], cc_task['Layout'], 0.05)
print(tukey_layout)
```

```
Multiple Comparison of Means - Tukey HSD, FWER=0.05
=====
group1 group2 meandiff p-adj    lower    upper    reject
-----
1D      2D -62.6333 0.0017 -100.7543 -24.5124    True
-----
```

```
In [40]: cc_task['Combos'] = cc_task['Condition'] + "-" + cc_task['Layout']
```

```
C:\Users\harde\AppData\Local\Temp\ipykernel_18196\1895316253.py:1: SettingWithCopyWarning:
A value is trying to be set on a copy of a slice from a DataFrame.
Try using .loc[row_indexer,col_indexer] = value instead
```

```
See the caveats in the documentation: https://pandas.pydata.org/pandas-docs/stable/user_guide/indexing.html#returning-a-view-versus-a-copy
cc_task['Combos'] = cc_task['Condition'] + "-" + cc_task['Layout']
```

```
In [41]: tukey_combos = pairwise_tukeyhsd(cc_task['Time'], cc_task['Combos'], 0.05)
print(tukey_combos)
```

```
Multiple Comparison of Means - Tukey HSD, FWER=0.05
=====
group1 group2 meandiff p-adj    lower    upper    reject
-----
1Dv2D-1D 1Dv2D-2D -128.7333 0.0 -193.3105 -64.1562    True
1Dv2D-1D 2Dv1D-1D -69.6 0.0299 -134.1771 -5.0229    True
1Dv2D-1D 2Dv1D-2D -66.1333 0.0428 -130.7105 -1.5562    True
1Dv2D-2D 2Dv1D-1D 59.1333 0.084 -5.4438 123.7105    False
1Dv2D-2D 2Dv1D-2D 62.6 0.0607 -1.9771 127.1771    False
2Dv1D-1D 2Dv1D-2D 3.4667 0.999 -61.1105 68.0438    False
-----
```

The practice effect (repeated measures issue) seems to have overwhelmed the effect of 2D layouts for 2Dv1D. Also, the results of the second layout in each order were not significant. Still, 2D came out on top!

```
In [42]: print("Overall Mean Time to Completion")
cc_task['Time'].mean()
```

```
Out[42]: Overall Mean Time to Completion
150.95
```

```
In [43]: print("Mean Time to Completion by Layout")
cc_task.groupby('Layout').mean()
```

```
Out[43]: Mean Time to Completion by Layout
```

|        | Time       |
|--------|------------|
| Layout |            |
| 1D     | 182.266667 |
| 2D     | 119.633333 |

```
In [44]: print("Mean Time to Completion by Condition and Layout")
cc_task.groupby(['Condition', 'Layout']).mean()
```

```
Out[44]: Mean Time to Completion by Condition and Layout
```

|           |        | Time       |
|-----------|--------|------------|
| Condition | Layout |            |
| 1Dv2D     | 1D     | 217.066667 |
|           | 2D     | 88.333333  |
| 2Dv1D     | 1D     | 147.466667 |
|           | 2D     | 150.933333 |

```
In [45]: smg.ProbPlot(cc_task["Time"]).qqplot(line='s')
```

Out[45]:

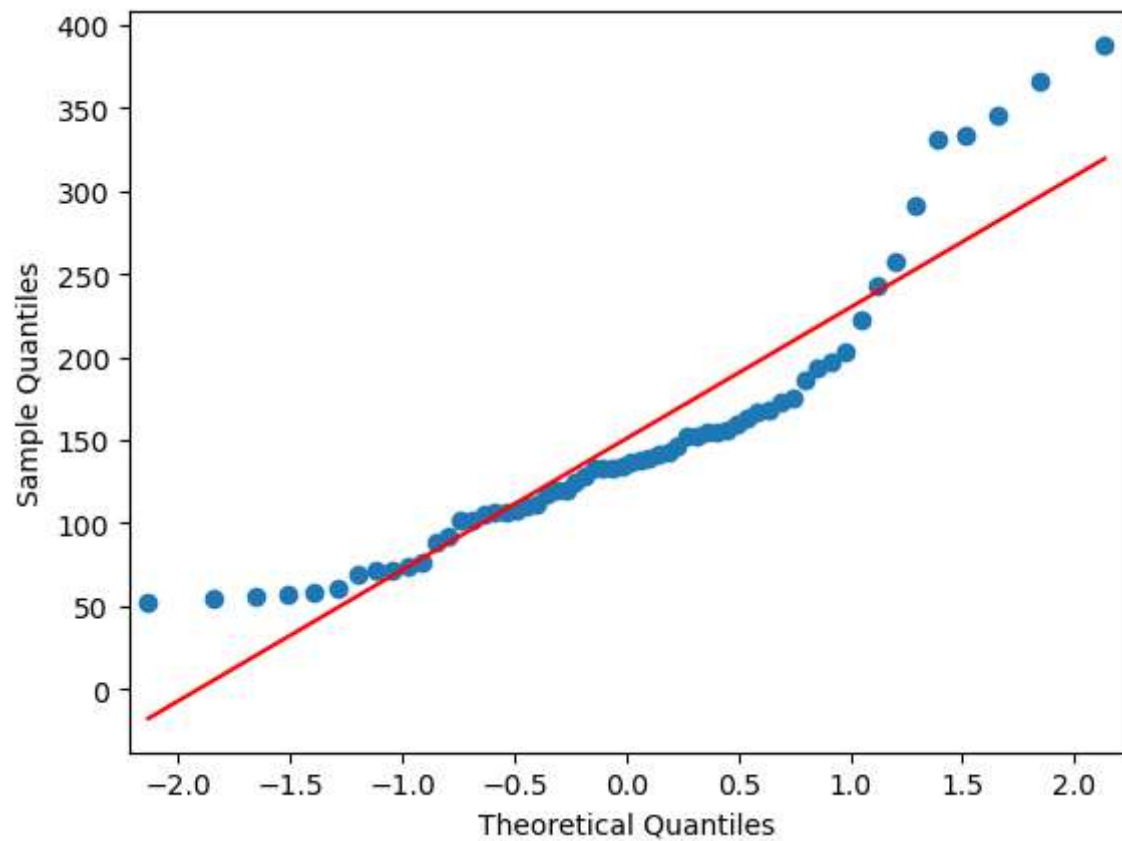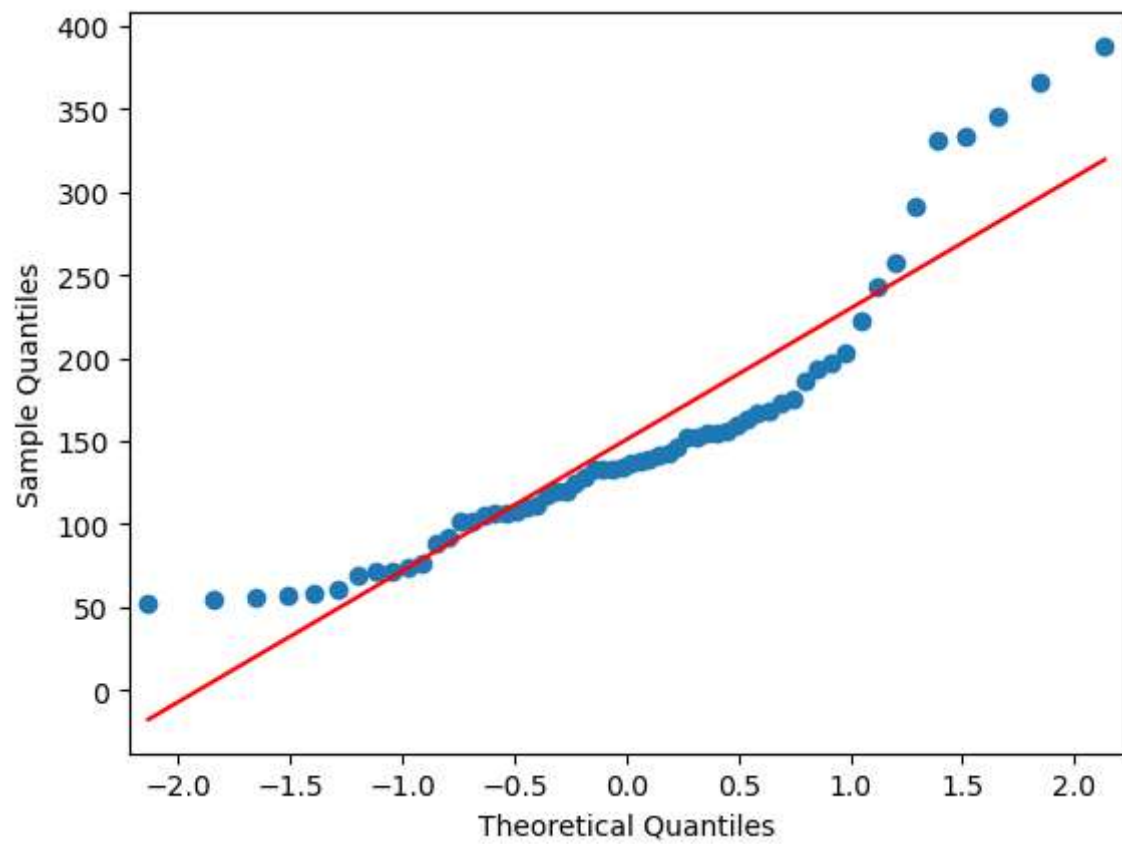

```
In [46]: stats.chisquare(cc_task["Time"])
```

Out[46]: Power\_divergenceResult(statistic=2480.1248757866842, pvalue=0.0)

```
In [47]: cc_task_1D = cc_task[cc_task["Layout"]=="1D"]
cc_task_2D = cc_task[cc_task["Layout"] == "2D"]
stats.kruskal(cc_task_1D['Time'], cc_task_2D['Time'])
```

```
Out[47]: KruskalResult(statistic=12.804076225415258, pvalue=0.00034586495138787547)
```

## Post-1D & 2D Likert Data Analysis

```
In [48]: post1d2d_data = pd.read_csv("Post1D2D_Likert_data.csv")
post1d2d_data
```

```
Out[48]:
```

|     | SID       | Condition | Layout | Question         | Rating |
|-----|-----------|-----------|--------|------------------|--------|
| 0   | 1D_1128_1 | 1Dv2D     | 1D     | Easy Nav         | 2      |
| 1   | 1D_1128_1 | 1Dv2D     | 1D     | Quick Find Info  | 2      |
| 2   | 1D_1128_1 | 1Dv2D     | 1D     | Easy VizCompare  | 2      |
| 3   | 1D_1128_1 | 1Dv2D     | 1D     | Easy NumCompare  | 2      |
| 4   | 1D_1128_1 | 1Dv2D     | 1D     | Easy CodeCompare | 1      |
| ... | ...       | ...       | ...    | ...              | ...    |
| 295 | 2D_1210_1 | 2Dv1D     | 2D     | Easy Nav         | 3      |
| 296 | 2D_1210_1 | 2Dv1D     | 2D     | Quick Find Info  | 3      |
| 297 | 2D_1210_1 | 2Dv1D     | 2D     | Easy VizCompare  | 3      |
| 298 | 2D_1210_1 | 2Dv1D     | 2D     | Easy NumCompare  | 3      |
| 299 | 2D_1210_1 | 2Dv1D     | 2D     | Easy CodeCompare | 3      |

300 rows × 5 columns

## Easy Navigation

```
In [49]: easyNav_data = post1d2d_data[post1d2d_data['Question'] == 'Easy Nav']
```

```
In [50]: easyNav_1d = easyNav_data[easyNav_data['Layout'] == '1D']
easyNav_2d = easyNav_data[easyNav_data['Layout'] == '2D']
```

```
In [51]: t_results = stats.ttest_rel(easyNav_1d['Rating'], easyNav_2d['Rating'])
t_results
```

```
Out[51]: Ttest_relResult(statistic=-5.520616976049565, pvalue=5.975635924933263e-06)
```

```
In [52]: w_results = stats.wilcoxon(easyNav_1d['Rating'], easyNav_2d['Rating'])
w_results
```



```
C:\ProgramData\Anaconda3\lib\site-packages\scipy\stats\_morestats.py:3255: UserWarning: Exact p-value calculation does not work if there are zeros. Switching to normal approximation.
```

```
warnings.warn("Exact p-value calculation does not work if there are "
```

```
Out[52]: WilcoxonResult(statistic=9.0, pvalue=4.9034562984353145e-05)
```

Both the paired t-test and the Wilcoxon test found that there was a statistically significant difference between the layout groups. Now to calculate the average difference and see if it is positive or negative.

```
In [53]: easyNav_diff = easyNav_1d['Rating'].to_numpy() - easyNav_2d['Rating'].to_numpy()
easyNav_diff
```

```
Out[53]: array([-1, -2, -5, -3,  0, -1,  0, -2,  0, -5,  1, -1, -1, -2, -4,  0,  0,
        -1, -2, -3, -1, -4, -6, -4, -4, -2,  0,  1, -2, -2], dtype=int64)
```

```
In [54]: easyNav_mean = np.mean(easyNav_diff)
easyNav_med = np.median(easyNav_diff)
print("Mean: " + str(easyNav_mean))
print("Median: " + str(easyNav_med))
```

```
Mean: -1.8666666666666667
```

```
Median: -2.0
```

Since both the mean and median are negative, and our equation was 1D - 2D, this means that 2D layouts were generally considered more usable for ease of navigation.

## Quick Find Info

```
In [55]: quickFind_data = post1d2d_data[post1d2d_data['Question'] == 'Quick Find Info']
```

```
In [56]: quickFind_1d = quickFind_data[quickFind_data['Layout'] == '1D']
quickFind_2d = quickFind_data[quickFind_data['Layout'] == '2D']
```

```
In [57]: t_results = stats.ttest_rel(quickFind_1d['Rating'], quickFind_2d['Rating'])
t_results
```

```
Out[57]: Ttest_relResult(statistic=-5.571719022297886, pvalue=5.187110861774126e-06)
```

```
In [58]: w_results = stats.wilcoxon(quickFind_1d['Rating'], quickFind_2d['Rating'])
w_results
```

```
Out[58]: WilcoxonResult(statistic=12.0, pvalue=6.891893067383647e-05)
```

Both the paired t-test and the Wilcoxon test found that there was a statistically significant difference between the layout groups. Now to calculate the average difference and see if it is positive or negative.

```
In [59]: quickFind_diff = quickFind_1d['Rating'].to_numpy() - quickFind_2d['Rating'].to_numpy()
quickFind_diff
```

```
Out[59]: array([-1, -2, -4, -2,  0,  0,  0, -2, -1, -5,  0,  0, -1, -3, -5,  0, -4,
        -1, -2, -1, -2, -3, -6, -2, -3, -2, -1, -1,  2, -2], dtype=int64)
```

```
In [60]: quickFind_mean = np.mean(quickFind_diff)
quickFind_med = np.median(quickFind_diff)
print("Mean: " + str(quickFind_mean))
print("Median: " + str(quickFind_med))
```

```
Mean: -1.8
Median: -2.0
```

Since both the mean and median are negative, and our equation was 1D - 2D, this means that 2D layouts were generally considered more usable in terms of quickly finding information.

## Easy VizCompare

```
In [61]: vizCom_data = post1d2d_data[post1d2d_data['Question'] == 'Easy VizCompare']
vizCom_1d = vizCom_data[vizCom_data['Layout'] == '1D']
vizCom_2d = vizCom_data[vizCom_data['Layout'] == '2D']
```

```
In [62]: t_results = stats.ttest_rel(vizCom_1d['Rating'], vizCom_2d['Rating'])
t_results
```

```
Out[62]: Ttest_relResult(statistic=-8.31259446888417, pvalue=3.6560239119618315e-09)
```

```
In [63]: w_results = stats.wilcoxon(vizCom_1d['Rating'], vizCom_2d['Rating'])
w_results
```

```
Out[63]: WilcoxonResult(statistic=0.0, pvalue=1.1061759441432599e-05)
```

Both the paired t-test and the Wilcoxon test found that there was a statistically significant difference between the layout groups. Now to calculate the average difference and see if it is positive or negative.

```
In [64]: vizCom_diff = vizCom_1d['Rating'].to_numpy() - vizCom_2d['Rating'].to_numpy()
vizCom_diff
```

```
Out[64]: array([ 0, -3, -5, -1, -2,  0, -4, -3, -3, -5,  0,  0, -1, -4, -5, -2, -4,
        -2,  0, -4, -4, -4, -6, -3, -5, -1, -4, -5, -1, -5], dtype=int64)
```

```
In [65]: vizCom_mean = np.mean(vizCom_diff)
vizCom_med = np.median(vizCom_diff)
print("Mean: " + str(vizCom_mean))
print("Median: " + str(vizCom_med))
```

```
Mean: -2.8666666666666667
Median: -3.0
```

Since both the mean and median are negative, and our equation was 1D - 2D, this means that 2D layouts were generally considered more usable in terms of comparing visualizations. This difference was also more significant (-3.0) than easy navigation or quickly finding information, which may indicate that the effects of a 2D layout on visual comparisons are stronger in usability than in the latter two.

## Easy NumCompare

```
In [66]: numCom_data = post1d2d_data[post1d2d_data['Question'] == 'Easy NumCompare']
numCom_1d = numCom_data[numCom_data['Layout'] == '1D']
numCom_2d = numCom_data[numCom_data['Layout'] == '2D']
```

```
In [67]: t_results = stats.ttest_rel(numCom_1d['Rating'], numCom_2d['Rating'])
t_results
```

```
Out[67]: Ttest_relResult(statistic=-7.623691083853344, pvalue=2.0948890712051675e-08)
```

```
In [68]: w_results = stats.wilcoxon(numCom_1d['Rating'], numCom_2d['Rating'])
w_results
```

```
Out[68]: WilcoxonResult(statistic=4.0, pvalue=7.7560571055044e-06)
```

Both the paired t-test and the Wilcoxon test found that there was a statistically significant difference between the layout groups. Now to calculate the average difference and see if it is positive or negative.

```
In [69]: numCom_diff = numCom_1d['Rating'].to_numpy() - numCom_2d['Rating'].to_numpy()
numCom_diff
```

```
Out[69]: array([ 0, -4, -5, -1, -2, -1, -2, -2, -4, -4,  1, -1, -1, -5, -4,  0, -1,
        -1,  0, -2, -4, -5, -6, -2, -6, -4, -4, -5, -5, -5], dtype=int64)
```

```
In [70]: numCom_mean = np.mean(numCom_diff)
numCom_med = np.median(numCom_diff)
print("Mean: " + str(numCom_mean))
print("Median: " + str(numCom_med))
```

```
Mean: -2.8333333333333335
Median: -3.0
```

Since both the mean and median are negative, and our equation was 1D - 2D, this means that 2D layouts were generally considered more usable in terms of comparing numerical results. This difference was also more significant (-3.0) than easy navigation or quickly finding information, which may indicate that the effects of a 2D layout on visual comparisons are stronger in usability than in the latter two.

## Easy CodeCompare

```
In [71]: codeCom_data = post1d2d_data[post1d2d_data['Question'] == 'Easy CodeCompare']
codeCom_1d = codeCom_data[codeCom_data['Layout'] == '1D']
codeCom_2d = codeCom_data[codeCom_data['Layout'] == '2D']
```

```
In [72]: t_results = stats.ttest_rel(codeCom_1d['Rating'], codeCom_2d['Rating'])
t_results
```

```
Out[72]: Ttest_relResult(statistic=-10.661467764759559, pvalue=1.513277414009814e-11)
```

```
In [73]: w_results = stats.wilcoxon(codeCom_1d['Rating'], codeCom_2d['Rating'])
w_results
```

```
Out[73]: WilcoxonResult(statistic=0.0, pvalue=1.862645149230957e-09)
```

Both the paired t-test and the Wilcoxon test found that there was a statistically significant difference between the layout groups. Now to calculate the average difference and see if it is positive or negative.

```
In [74]: codeCom_diff = codeCom_1d['Rating'].to_numpy() - codeCom_2d['Rating'].to_numpy()
codeCom_diff
```

```
Out[74]: array([-2, -5, -5, -1, -2, -1, -2, -3, -4, -5, -1, -2, -1, -6, -4, -4, -1,
        -3, -1, -5, -4, -5, -6, -2, -6, -4, -5, -6, -5, -6], dtype=int64)
```

```
In [75]: codeCom_mean = np.mean(codeCom_diff)
codeCom_med = np.median(codeCom_diff)
print("Mean: " + str(codeCom_mean))
print("Median: " + str(codeCom_med))
```

```
Mean: -3.5666666666666667
```

```
Median: -4.0
```

Since both the mean and median are negative, and our equation was 1D - 2D, this means that 2D layouts were generally considered more usable in terms of comparing code. This difference was also more significant (-4.0) than all other ratings, which may indicate that the effects of a 2D layout on visual comparisons can be very helpful in comparing code.
