# Supplementary material
Source: ML conference proceedings conference paper supplement (https://openreview.net/forum?id=Gkogn48LeI)
Supplement: supplementary_material [file attachment]

NOTE: CONDITION IN THE DATA IS EQUIVALENT TO ORDER IN THE PAPER.

```
> library(readr)
> times_by_taskOrderLayout <- read_csv("C:/Users/harde/OneDrive/Desktop/Research Stuff/mark 2/2Dv1D CNB Efficiency Times.csv",
+   col_types = cols(Layout = col_character()))
> View(times_by_taskOrderLayout)
> find_task = times_by_taskOrderLayout[times_by_taskOrderLayout$Task == 'Find',]
> View(find_task)
> View(times_by_taskOrderLayout)
> find_data = data.frame(find_task$Condition, find_task$Layout, find_task$Time)
> View(find_data)
> View(find_task)
> str(find_data)
'data.frame': 60 obs. of 3 variables:
 $ find_task.Condition: chr "1Dv2D" "1Dv2D" "1Dv2D" "1Dv2D" ...
 $ find_task.Layout : chr "1D" "2D" "1D" "2D" ...
 $ find_task.Time : num 72 88 92 102 37 52 110 51 75 30 ...
> library(rcompanion)
> scheirerRayHare(find_task.Time ~ find_task.Condition + find_task.Layout, data = find_data)
```

DV: find\_task.Time  
Observations: 60  
D: 0.998444  
MS total: 305

|                                      | Df | Sum Sq  | H      | p.value |
|--------------------------------------|----|---------|--------|---------|
| find_task.Condition                  | 1  | 673.4   | 2.2111 | 0.13702 |
| find_task.Layout                     | 1  | 1135.4  | 3.7283 | 0.05350 |
| find_task.Condition:find_task.Layout | 1  | 86.4    | 0.2837 | 0.59427 |
| Residuals                            | 56 | 16071.9 |        |         |

```
> gc_task = times_by_taskOrderLayout[times_by_taskOrderLayout$Task == 'Graph Compare',]
> View(gc_task)
> gc_data = data.frame(gc_task$Condition, gc_task$Layout, gc_task$Time)
> str(gc_data)
'data.frame': 60 obs. of 3 variables:
 $ gc_task.Condition: chr "1Dv2D" "1Dv2D" "1Dv2D" "1Dv2D" ...
 $ gc_task.Layout : chr "1D" "2D" "1D" "2D" ...
 $ gc_task.Time : num 171 114 157 133 113 62 170 74 112 73 ...
> View(gc_data)
> scheirerRayHare(gc_task.Time ~ gc_task.Condition + gc_task.Layout, data = gc_data)
```

DV: gc\_task.Time  
Observations: 60  
D: 0.9992776  
MS total: 305

|                                  | Df | Sum Sq  | H       | p.value  |
|----------------------------------|----|---------|---------|----------|
| gc_task.Condition                | 1  | 395.3   | 1.2969  | 0.254781 |
| gc_task.Layout                   | 1  | 5115.3  | 16.7835 | 0.000042 |
| gc_task.Condition:gc_task.Layout | 1  | 693.6   | 2.2757  | 0.131412 |
| Residuals                        | 56 | 11777.9 |         |          |

```
> nc_task = times_by_taskOrderLayout[times_by_taskOrderLayout$Task == 'Number Compare',]
> View(nc_task)
> nc_data = data.frame(nc_task$Condition, nc_task$Layout, nc_task$Time)
> View(nc_data)
```

```
> scheirerRayHare(nc_task.Time ~ nc_task.Condition + nc_task.Layout, data = nc_data)
```

```
DV: nc_task.Time
Observations: 60
D: 0.9987219
MS total: 305
```

|                                  | Df | Sum Sq  | H       | p.value |
|----------------------------------|----|---------|---------|---------|
| nc_task.Condition                | 1  | 104.0   | 0.3415  | 0.55898 |
| nc_task.Layout                   | 1  | 6262.8  | 20.5601 | 0.00001 |
| nc_task.Condition:nc_task.Layout | 1  | 614.4   | 2.0170  | 0.15555 |
| Residuals                        | 56 | 10990.8 |         |         |

```
> pt_task = times_by_taskOrderLayout[times_by_taskOrderLayout$Task == 'Parameter Tuning',]
> View(pt_task)
> pt_data = data.frame(pt_task$Condition, pt_task$Layout, pt_task$Time)
> View(pt_data)
> scheirerRayHare(pt_task.Time ~ pt_task.Condition + pt_task.Layout, data = pt_data)
```

```
DV: pt_task.Time
Observations: 60
D: 0.9997221
MS total: 305
```

|                                  | Df | Sum Sq  | H      | p.value |
|----------------------------------|----|---------|--------|---------|
| pt_task.Condition                | 1  | 24.1    | 0.0789 | 0.77875 |
| pt_task.Layout                   | 1  | 2613.6  | 8.5716 | 0.00341 |
| pt_task.Condition:pt_task.Layout | 1  | 147.3   | 0.4830 | 0.48708 |
| Residuals                        | 56 | 15205.1 |        |         |

```
> cc_task = times_by_taskOrderLayout[times_by_taskOrderLayout$Task == 'Code Comparison',]
> View(cc_task)
> cc_data = data.frame(cc_task$Condition, cc_task$Layout, cc_task$Time)
> View(cc_data)
> scheirerRayHare(cc_task.Time ~ cc_task.Condition + cc_task.Layout, data = cc_data)
```

```
DV: cc_task.Time
Observations: 60
D: 0.9997499
MS total: 305
```

|                                  | Df | Sum Sq  | H       | p.value |
|----------------------------------|----|---------|---------|---------|
| cc_task.Condition                | 1  | 6.7     | 0.0219  | 0.88245 |
| cc_task.Layout                   | 1  | 3904.3  | 12.8041 | 0.00035 |
| cc_task.Condition:cc_task.Layout | 1  | 3744.6  | 12.2804 | 0.00046 |
| Residuals                        | 56 | 10335.0 |         |         |

```
> dunnTest(gc_task.Time ~ gc_task.Layout, data = gc_data, method = "bonferroni")
```

Dunn (1964) Kruskal-wallis multiple comparison  
p-values adjusted with the Bonferroni method.

|   | Comparison | Z        | P.unadj      | P.adj        |
|---|------------|----------|--------------|--------------|
| 1 | 1D - 2D    | 4.096766 | 4.189622e-05 | 4.189622e-05 |

Warning message:

gc\_task.Layout was coerced to a factor.

```
> dunnTest(nc_task.Time ~ nc_task.Layout, data = nc_data, method = "bonferroni")
```

Dunn (1964) Kruskal-Wallis multiple comparison  
p-values adjusted with the Bonferroni method.

```
Comparison      Z      P.unadj      P.adj
1 1D - 2D 4.534325 5.778798e-06 5.778798e-06
```

Warning message:

nc\_task.Layout was coerced to a factor.

```
> dunnTest(pt_task.Time ~ pt_task.Layout, data = pt_data, method = "bonferroni")
```

Dunn (1964) Kruskal-Wallis multiple comparison  
p-values adjusted with the Bonferroni method.

```
Comparison      Z      P.unadj      P.adj
1 1D - 2D 2.927723 0.003414541 0.003414541
```

Warning message:

pt\_task.Layout was coerced to a factor.

```
> dunnTest(cc_task.Time ~ cc_task.Layout, data = cc_data, method = "bonferroni")
```

Dunn (1964) Kruskal-Wallis multiple comparison  
p-values adjusted with the Bonferroni method.

```
Comparison      Z      P.unadj      P.adj
1 1D - 2D 3.578278 0.000345865 0.000345865
```

Warning message:

cc\_task.Layout was coerced to a factor.

```
> View(gc_data_1D)
> gc_data_2D = gc_data[gc_data$gc_task.Layout == "2D",]
> median(gc_data_1D$gc_task.Time) - median(gc_data_2D$gc_task.Time)
[1] 43
> median(gc_data_1D$gc_task.Time)
[1] 96
> median(gc_data_2D$gc_task.Time)
[1] 53
> 43/96
[1] 0.4479167
> nc_data_1D = nc_data[nc_data$nc_task.Layout == "1D",]
> nc_data_2D = nc_data[nc_data$nc_task.Layout == "2D",]
> median(nc_data_1D)
Error in median.default(nc_data_1D) : need numeric data
> median(nc_data_1D$nc_task.Time)
[1] 43
> median(nc_data_2D$nc_task.Time)
[1] 28.5
> 43 - 28.5
[1] 14.5
> 14.5 / 43
[1] 0.3372093
> pt_data_2D = pt_data[pt_data$pt_task.Layout == "2D",]
> pt_data_1D = pt_data[pt_data$pt_task.Layout == "1D",]
> median(pt_data_1D$pt_task.Time)
Error: object 'pt_data_1D' not found
> pt_data_2D = pt_data[pt_data$pt_task.Layout == "2D",]
> pt_data_1D = pt_data[pt_data$pt_task.Layout == "1D",]
> median(pt_data_1D$pt_task.Time)
[1] 255
> median(pt_data_2D$pt_task.Time)
[1] 196.5
> 255 - 196.5
[1] 58.5
> 58.5/255
```

```
[1] 0.2294118
> cc_data_1D = cc_data[cc_data$cc_task.Layout == "1D",]
> cc_data_2D = cc_data[cc_data$cc_task.Layout == "2D",]
> median(cc_data_1D$cc_task.Time)
[1] 157.5
> median(cc_data_2D$cc_task.Time)
[1] 106
> 157.5 - 106
[1] 51.5
> 51.5/157.5
[1] 0.3269841
```
